# Supplementary material
Source: Research Square preprint supplement (doi:10.21203/rs.3.rs-10106643/v1)
Supplement: Supplementary file 1 [file 365a53a150d32e42bbe6139b.docx]

**Supporting Information**

Effect of activated carbon on the production selectivity of Ni/MoC catalyst for methanol steam reforming

Yawen Qi,*a* Xinxin Zhao,*a* Rong Zhang,*a* Ling Cao,*b,** Fufeng Cai,*a,b,**

*a* Faculty of Chemical Engineering and Energy Technology, Shanghai Institute of Technology, Shanghai 201418, PR China

*b* College of Chemistry and Chemical Engineering, Changji University, Changji, 831100, PR China

E-mail addresses: caiff@sit.edu.cn (F. Cai), caolinggirl@126.com (L. Cao).

Tel./Fax: +86 21 60877223.

This file includes:

Fig. S1-S2.

**
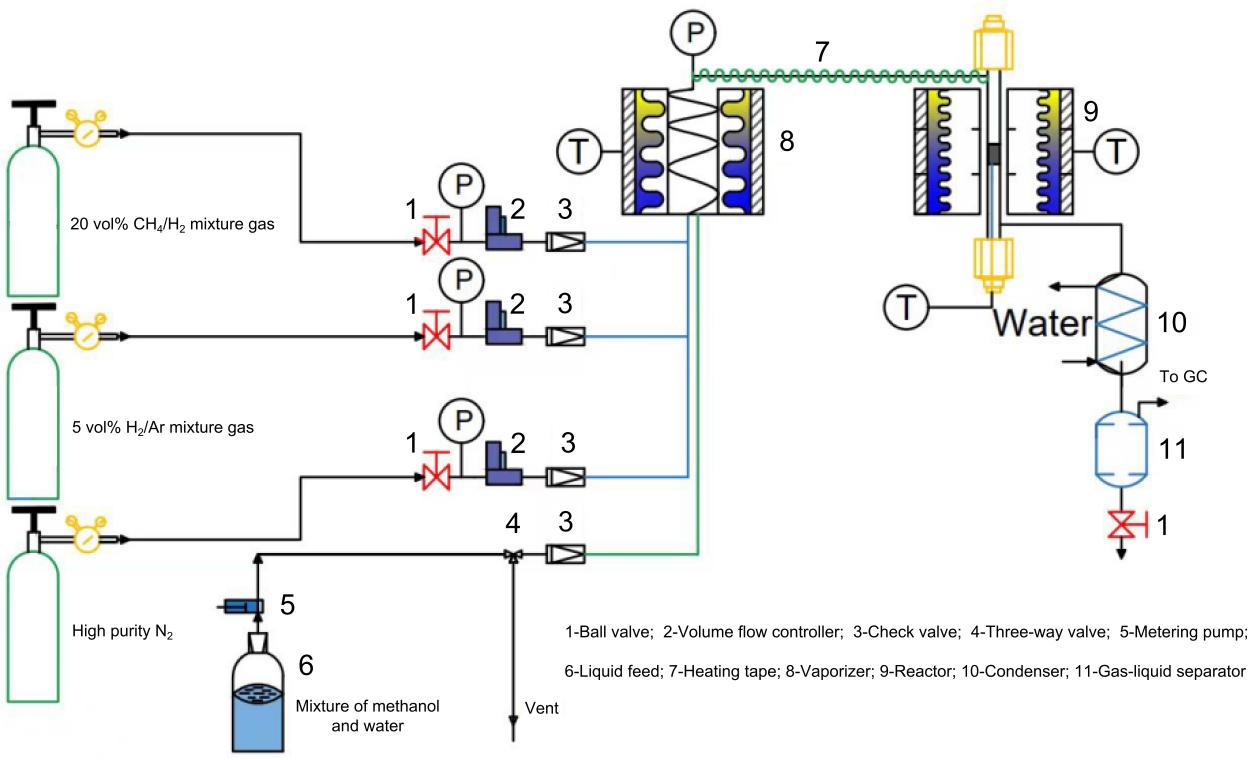
**

**Fig. S1.** Schematic diagram of the experimental apparatus for methanol steam reforming (MSR) reaction. The MSR experiment was performed in a vertical fixed-bed flow reactor. The experimental apparatus mainly contained the reactor, vaporizer, condenser, gas chromatograph, *etc*. The reactor and vaporizer were an electric heating furnace. The condenser was a gas–liquid separator. The flow range of metering pump was from 0.001ml/min to 0.500 ml/min. The gas chromatograph (GC9790Ⅱ, China) was equipped with two thermal conductivity detectors, and the chromatographic columns were respectively Plot Q (analysis of CO2) and 5A molecular sieve (analysis of H2, N2, CH4 and CO). The carrier gas for the GC was high-purity Ar.


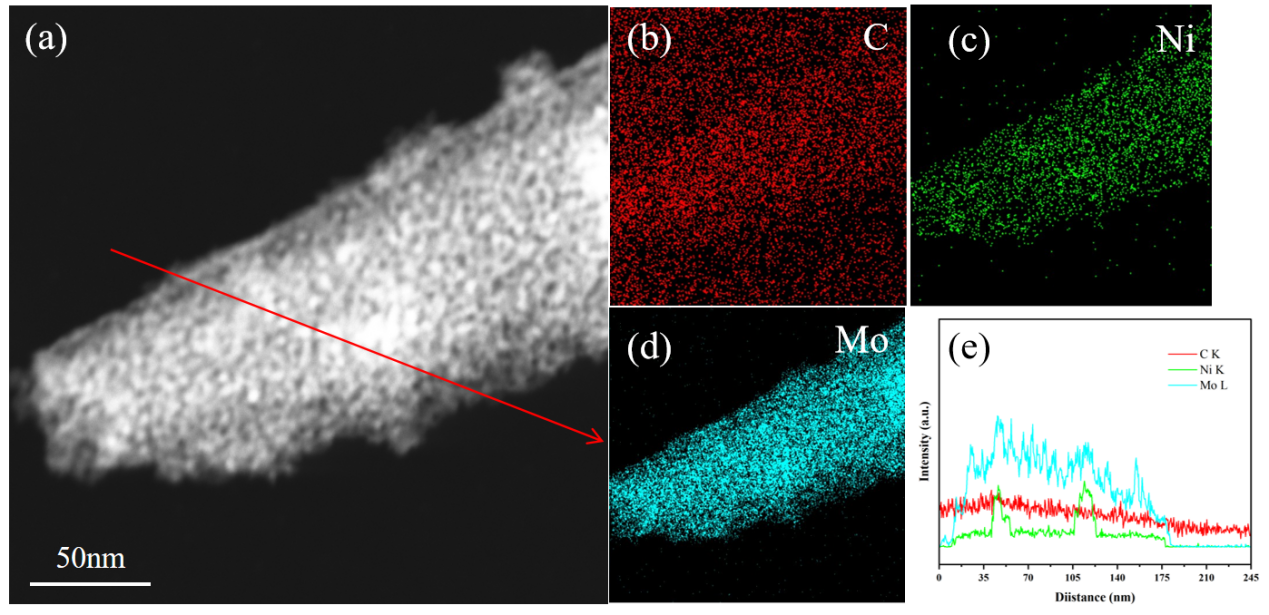


**Fig. S2.** (a) TEM image of 5CNi/MoC catalyst; (b-d) corresponding EDX element mappings of 5CNi/MoC catalyst; (e) EDX line spectra along the red arrow in (a).
